# Supplementary material for: Preparation of acacia tannin loaded lipid microparticles by solid-in-oil-in-water and melt dispersion methods, their characterization and evaluation of their effect on ruminal gas production In Vitro
Source: PLoS One. 2018 Oct 25;13(10):e0206241. doi: 10.1371/journal.pone.0206241 (PMC6201938; doi:10.1371/journal.pone.0206241)
Supplement: S1 Table — (XLSX) [file pone.0206241.s001.xlsx]

## Sheet: MIcroparticle properties
			Encapsulation efficiency			Yield		Particule Diameter	diameter
	REP	EE	mean	SD	yield	MEAN	SD	mean	SD
L1	1	77.3	78.5667	4.82632	59.035	57.245	1.87232	33.87	10.1728
L1	2	74.5			57.4
L1	3	83.9			55.3
L2	1	71.7	75.2667	3.13741	62.84	65.7133	3.85934	39.47	12.6741
L2	2	76.5			70.1
L2	3	77.6			64.2
L3	1	65.2	68.5667	3.06649	70.035	71.3783	4.02193	44.74	11.3225
L3	2	69.3			75.9
L3	3	71.2			68.2
L4	1	75.7	74.6333	3.71663	77.869	73.323	4.53454	48.62	12.5593
L4	2	70.5			73.3
L4	3	77.7			68.8
P3	1	79.4	74.29	4.80232	69.14	72.38	3.23005	30.4114	16.0138
P3	2	69.87			75.6
P3	3	73.6			72.4
P4	1	66.4	68.8	4.07063	68.68	74.5267	5.58213	36.5466	14.6312
P4	2	73.5			79.8
P4	3	66.5			75.1
P1	1	85.1	80.1	5.44426	68.14	63.08	4.83789	26.765	15.2695
P1	2	74.3			62.6
P1	3	80.9			58.5
P2	1	77.9	77.8333	3.30051	62.668	65.7893	2.74035	32.67	9.54067
P2	2	74.5			67.8
P2	3	81.1			66.9

## Sheet: In vitro release in acetate
							mean
Blank Readings		0.1122	0.106	0.1074	0.0988	.1119.1031	0.1061
							absorbance	Std. Concentration
Blank				Absorbance	Blank	Net Absorbance	0	0
			T1	0.1199	0.1061	0.0138	0.0138	2
			T2	0.185	0.1061	0.0789	0.0789	4
			T3	0.2897	0.1061	0.1836	0.1836	6
			T4	0.3323	0.1061	0.2262	0.2262	8
			T5	0.405	0.1061	0.2989	0.2989	10
		In vitro Release in Acetate Buffer media
Time, h	Sample	ABS	Conc	Conc IN mL	conc rel to raw	% release	mean	STD DEV
30M	L1	0.2856	9.6201	4.81005	7.40008	3.79491	3.83087	0.0508598
30M	L2	0.2916	9.80243	4.90122	7.54033	3.86684							Summary
30M	P1	0.2174	7.54757	3.77378	5.80582	2.97734	2.74418	0.329741
30M	P2	0.1785	6.36544	3.18272	4.89649	2.51102					time	ETE-L		ETE-P		Raw-ATE
30M	R1	1.5509	48.0713	96.1426	96.1426	49.3039	52.9553	5.1638			0.5	3.83087	0.0508598	2.74418	0.329741	52.9553	5.1638
30M	R2	1.7852	55.1914	110.383	110.383	56.6066					1	5.08	0.152579	3.0247	0.0635748	63.9973	8.22615
1H	L1	0.4018	13.1513	6.57565	10.1164	5.18789	5.08	0.152579			2	8.39422	0.686726	6.67497	0.445023	77.3256	2.75491
1H	L2	0.3838	12.6043	6.30215	9.69561	4.97211					4	13.0469	1.52724	10.7643	0.458162	81.9825	7.36497
1H	P1	0.2176	7.55365	3.77682	5.8105	2.97974	3.0247	0.0635748			8	18.9267	1.10705	17.7387	1.04771	86.267	1.77967
1H	P2	0.2251	7.78156	3.89078	5.98582	3.06965					24	21.2151	3.7738	18.3919	2.92461	92.5279	9.09119
1H	R1	0.7157	22.6904	113.452	113.452	58.1805	63.9973	8.22615
1H	R2	0.865	27.2275	136.137	136.137	69.8141
2H	L1	0.62876	20.0484	10.0242	15.4218	7.90863	8.39422	0.686726
2H	L2	0.709774	22.5103	11.2552	17.3156	8.87981
2H	P1	0.5521	17.7188	8.85938	13.6298	6.98965	6.67497	0.445023
2H	P2	0.4996	16.1233	8.06167	12.4026	6.36029
2H	R1	0.9364	29.3973	146.986	146.986	75.3776	77.3256	2.75491
2H	R2	0.9864	30.9167	154.584	154.584	79.2736
4H	L1	0.9673	30.3363	15.1681	23.3356	11.967	13.0469	1.52724
4H	L2	1.14747	35.8115	17.9057	27.5473	14.1268
4H	P1	0.83995	26.4662	13.2331	20.3586	10.4403	10.7643	0.458162
4H	P2	0.894	28.1088	14.0544	21.6221	11.0883
4H	R1	1.088	34.0042	170.021	170.021	87.1903	81.9825	7.36497
4H	R2	0.95433	29.9421	149.711	149.711	76.7747
8H	L1	0.7911	24.9817	24.9817	38.4334	19.7095	18.9267	1.10705
8H	L2	0.7258	22.9973	22.9973	35.3805	18.1439
8H	P1	0.678	21.5447	21.5447	33.1458	16.9978	17.7387	1.04771
8H	P2	0.7398	23.4228	23.4228	36.035	18.4795
8H	R1	1.0923	34.1349	170.675	170.675	87.5254	86.267	1.77967
8H	R2	1.06	33.1533	165.767	165.767	85.0086
24H	L1	0.9652	30.2725	30.2725	46.573	23.8836	21.2151	3.7738
24H	L2	0.7426	23.5079	23.5079	36.166	18.5466
24H	P1	0.8224	25.9329	25.9329	39.8968	20.4599	18.3919	2.92461
24H	P2	0.64989	20.6905	20.6905	31.8315	16.3239
24H	R1	1.074	33.5788	167.894	167.894	86.0995	92.5279	9.09119
24H	R2	1.239	38.593	192.965	192.965	98.9563

## Sheet: In vitro release in phosphate 
											mean
		Standard			Blanks	0.1122	0.106	0.1074	0.0988	.1119.1031	0.1061
Blank	0	0
T1	0.0138	2		0.1199	0.1061	0.0138
T2	0.0789	4		0.185	0.1061	0.0789
T3	0.1836	6		0.2897	0.1061	0.1836
T4	0.2262	8		0.3323	0.1061	0.2262
T5	0.2989	10		0.405	0.1061	0.2989
					In vitro release in Phosphate Buffer
Actual Load	Time	Sample	ABS	Conc	Conc IN mL	conc rel to raw	% release	mean	STD DEV
	30M	L1	1.5741	48.7763	24.3882	37.5202	17.8668	15.8609	2.83677					Summary
	30M	L2	1.2137	37.8241	18.9121	29.0955	13.855					time	ETE-L		ETE-P		Raw-ATE
	30M	P1	1.0334	32.345	16.1725	24.8808	11.848	13.1554	1.84894			0.5	15.6089	2.83677	13.1554	1.84894	59.3169	2.16725
	30M	P2	1.2683	39.4834	19.7417	30.3718	14.4628					1	15.9878	0.587189	17.238	2.82102	78.0805	7.03434
	30M	R1	1.9656	60.6736	121.347	121.347	57.7844	59.3169	2.16725			2	20.4505	0.683217	21.0543	0.11728	81.8343	4.53528
	30M	R2	2.0715	63.8918	127.784	127.784	60.8493					4	26.6434	1.59785	22.8488	0.658816	89.8894	7.8687
	1H	L1	1.4426	44.7802	22.3901	34.4463	16.403	15.9878	0.587189			8	28.3256	7.28712	26.634	3.30746	91.5532	3.40743
	1H	L2	1.368	42.5132	21.2566	32.7024	15.5726					24	34.2865	6.58029	28.3545	0.376241	94.8995	4.28694
	1H	P1	1.6451	50.9339	25.467	39.18	18.6571	17.3163	1.89616
	1H	P2	1.4042	43.6132	21.8066	33.5486	15.9755
	1H	R1	0.9821	30.786	153.93	153.93	73.3001	78.7773	7.74601
	1H	R2	1.1335	35.3869	176.935	176.935	84.2546
	2H	L1	1.6338	50.5905	25.2953	38.9158	18.5313	20.0719	2.17874
	2H	L2	1.9106	59.0022	29.5011	45.3863	21.6125
	2H	P1	1.853	57.2518	28.6259	44.0399	20.9714	21.0543	0.11728
	2H	P2	1.8679	57.7046	28.8523	44.3882	21.1372
	2H	R1	1.2421	38.6872	193.436	193.436	92.1123	81.8343	14.5353
	2H	R2	0.958	30.0537	150.268	150.268	71.5563
	4H	L1	2.1772	67.1039	33.552	51.6184	24.5802	26.3362	2.48335
	4H	L2	2.4927	76.6917	38.3458	58.9936	28.0922
	4H	P1	1.1408	35.6088	17.8044	27.3914	13.0435	18.9265	8.31982
	4H	P2	2.1978	67.7299	33.865	52.1	24.8095
	4H	R1	1.1772	36.7149	183.575	183.575	87.4165	90.8461	4.85021
	4H	R2	1.272	39.5958	197.979	197.979	94.2757
	8H	L1	1.4728	45.6979	45.6979	70.3045	33.4783	28.3256	7.28712
	8H	L2	1.0099	31.6309	31.6309	48.6628	23.1728
	8H	P1	1.2255	38.1827	38.1827	58.7426	27.9727	27.1768	1.12558
	8H	P2	1.154	36.0099	36.0099	55.3999	26.3809
	8H	R1	1.2358	38.4957	192.479	192.479	91.6565	91.1355	0.736741
	8H	R2	1.2214	38.0581	190.291	190.291	90.6146
	24H	L1	1.7181	53.1523	53.1523	81.7728	38.9394	34.2865	6.58029
	24H	L2	1.3001	40.4497	40.4497	62.2304	29.6335
	24H	P1	1.2546	39.067	39.067	60.1031	28.6205	28.3545	0.376241
	24H	P2	1.2307	38.3407	38.3407	58.9858	28.0885
	24H	R1	1.364	42.3916	211.958	211.958	100.932	94.4892	9.11205
	24H	R2	1.1859	36.9793	184.897	184.897	88.046
	rct acetate	1	1.3814	42.9204	214.602	221.462
		2	1.4717	45.6645	228.322

## Sheet: In vitro release in HCl 
											mean
		Standard			Blanks	0.1122	0.106	0.1074	0.0988	.1119.1031	0.1061
Blank	0	0
T1	0.0138	2		0.1199	0.1061	0.0138
T2	0.0789	4		0.185	0.1061	0.0789
T3	0.1836	6		0.2897	0.1061	0.1836
T4	0.2262	8		0.3323	0.1061	0.2262
T5	0.2989	10		0.405	0.1061	0.2989
			In vitro release in HCl buffer
Actual Load	Time	Sample	ABS	Conc	Conc IN mL	conc rel to raw	% release	mean	STD DEV
	30M	L1	0.6094	19.4601	9.73003	14.9693	8.55387	7.41712	1.60761
	30M	L2	0.4392	14.2878	7.14392	10.9907	6.28037
	30M	P1	0.6368	20.2927	10.1464	15.6098	8.91987	9.16232	0.342868
	30M	P2	0.6731	21.3958	10.6979	16.4583	9.40476
	30M	R1	1.8373	56.7747	113.549	113.549	64.8854	69.6782	6.77801
	30M	R2	2.1133	65.1621	130.324	130.324	74.4709				time	ETE-L		ETE-P		Raw-ATE
	1H	L1	1.0084	31.5853	15.7926	24.2964	13.8836	13.9284	0.0632841		0.5	7.41712	1.60761	9.16232	0.342868	69.6782	4.77801
	1H	L2	1.0151	31.7889	15.8944	24.453	13.9731				1	13.9284	0.0632841	11.5358	0.14357	78.6056	6.56313
	1H	P1	0.8999	28.2881	14.144	21.76	12.4343	12.5358	0.14357		2	17.889	1.31385	12.1231	0.462824	87.8799	6.38782
	1H	P2	0.9151	28.75	14.375	22.1154	12.6374				4	20.1271	0.0925648	15.6796	1.09094	88.7091	5.96464
	1H	R1	0.8325	26.2398	131.199	131.199	74.971	78.4831	4.96686		8	19.965	3.3909	17.2412	3.42301	88.8284	3.08203
	1H	R2	0.9134	28.6983	143.492	143.492	81.9952				24	25.256	6.3473	20.5729	1.20334	90.4152	4.97078
	2H	L1	1.3778	42.811	21.4055	32.9315	18.818	17.889	1.31385
	2H	L2	1.2387	38.5839	19.2919	29.6799	16.9599
	2H	P1	0.8521	26.8355	13.4177	20.6427	11.7958	12.1231	0.462824
	2H	P2	0.9011	28.3245	14.1623	21.7881	12.4503
	2H	R1	0.9266	29.0994	145.497	145.497	83.1413	87.5911	6.29299
	2H	R2	1.0291	32.2143	161.072	161.072	92.0409
	4H	L1	1.4709	45.6402	22.8201	35.1078	20.0616	20.1271	0.0925648
	4H	L2	1.4807	45.938	22.969	35.3369	20.1925
	4H	P1	1.2006	37.426	18.713	28.7893	16.451	15.6796	1.09094
	4H	P2	1.0851	33.9161	16.9581	26.0893	14.9082
	4H	R1	0.9419	29.5644	147.822	147.822	84.4697	88.7893	6.10881
	4H	R2	1.0414	32.5881	162.941	162.941	93.1089
	8H	L1	0.8061	25.4376	25.4376	39.1347	22.3627	19.965	3.3909
	8H	L2	0.6266	19.9827	19.9827	30.7427	17.5673
	8H	P1	0.6827	21.6876	21.6876	33.3655	19.066	17.2467	2.57292
	8H	P2	0.5465	17.5486	17.5486	26.9978	15.4273
	8H	R1	0.967	30.3272	151.636	151.636	86.649	88.8284	3.08203
	8H	R2	1.0172	31.8527	159.263	159.263	91.0077
	24H	L1	1.0824	33.8341	33.8341	52.0524	29.7442	25.256	6.3473
	24H	L2	0.7464	23.6233	23.6233	36.3436	20.7678
	24H	P1	0.8201	25.863	25.863	39.7893	22.7367	20.2749	3.48157
	24H	P2	0.6358	20.2623	20.2623	31.1728	17.813
	24H	R1	1.084	33.8827	169.413	169.413	96.8076	90.7298	8.59531
	24H	R2	0.944	29.6282	148.141	148.141	84.652
	rct acetate	1	0.9778	30.6554	153.277	170.667
		2	1.2067	37.6114	188.057

## Sheet: Gas and methane production
		v1	v2	v3	v4	v5	v6	v7	v8	v9	v10	v11	v12
	Run	2H Gas volume, mL	4H Gas volume, mL	8H Gas volume, mL	12H Gas volume, mL	24H Gas volume, mL	2H Methane, mL	4H Methane, mL	8H Methane, mL	12H Methane, mL	24H Methane, mL	methane/total gas volume	pH,24h
EragrostisOnly	1	9.44369	15.5767	21.1126	26.7029	49.6879	0.88081	1.32885	1.82537	2.35464	4.82025	9.70105	6.95
EragrostisOnly	2	14.1927	22.6323	26.7471	32.4016	50.8942	1.33553	2.25168	2.61263	3.08911	5.22949	10.2752	6.99
EragrostisOnly	3	10.1221	16.3908	20.2985	23.9892	40.612	0.903821	1.59084	1.95067	2.39059	4.71288	11.6047	6.884
Lard+Eragr	1	9.03664	15.441	21.1126	26.9742	49.6879	0.511268	1.0057	1.57711	2.13344	4.58311	9.22379	6.93
Lard+Eragr	2	10.2578	16.1194	21.2483	26.4315	47.517	0.918581	1.55473	2.01154	2.38604	4.60073	9.68229	6.979
Lard+Eragr	3	12.7001	19.9186	25.5902	31.1805	52.9444	1.13513	1.92736	2.43803	2.96577	5.25443	9.92443	6.858
LTE+Eragr	1	10.2578	16.5265	21.5197	26.0244	43.8535	0.939654	1.56318	1.92517	2.45684	4.11029	9.37276	6.76
LTE+Eragr	2	7.13704	12.4559	17.1778	21.9539	39.3759	0.616495	1.18471	1.61569	2.05632	4.17493	10.6028	6.984
LTE+Eragr	3	12.9715	17.8833	20.9769	25.4817	43.3107	1.1356	1.66245	1.94066	2.47097	4.07357	9.40545	6.531
PalmOil+Eragr	1	9.17232	16.5265	22.0624	27.517	47.924	0.842054	1.40796	1.90346	2.41611	4.58276	9.56254	6.91
PalmOil+Eragr	2	6.5943	13.5414	19.4844	24.9389	45.7531	0.615046	1.35269	1.89456	2.40982	4.63864	10.1384	6.96
PalmOil+Eragr	3	10.9362	18.019	23.1479	27.924	47.924	0.941194	1.70573	2.07593	2.63769	4.73617	9.88266	6.81
PTE+Eragr	1	9.44369	16.1194	20.7056	25.346	44.2605	0.850435	1.5702	1.95289	2.32879	4.27634	9.66175	6.91
PTE+Eragr	2	8.62958	14.8982	19.7558	24.8033	43.4464	0.769605	1.25312	1.69548	2.29873	4.32491	9.95457	6.993
PTE+Eragr	3	9.30801	16.1194	20.9769	25.7531	43.4464	0.804561	1.54	1.92271	2.49427	4.33337	9.97406	6.843
RawATE+Erag	1	3.06649	10.5563	14.5997	18.4261	36.2551	0.289137	1.08666	1.38548	1.69992	3.84591	10.6079	6.85
RawATE+Erag	2	7.95116	14.3555	18.9417	23.0394	39.5115	0.717488	1.20767	1.61638	1.99546	3.75966	9.51534	6.956
RawATE+Erag	3	8.4939	14.0841	17.9919	21.6825	38.019	0.721527	1.3047	1.65119	2.08086	3.65449	9.61228	6.791
TMROnly	1	30.2035	51.9403	77.0149	98.7517	156.337	2.08449	3.884	6.22234	8.45693	16.7943	10.7424	6.663
TMROnly	2	28.8467	50.0407	74.7083	96.4451	156.201	2.11864	3.85344	6.20487	8.03002	16.74	10.717	6.677
TMROnly	3	28.5753	50.7191	75.251	97.5306	158.779	1.69353	3.62845	6.05369	8.39055	16.8693	10.6244	6.645
Lard+TMR	1	27.3541	50.0407	72.5373	91.8318	145.346	2.01146	3.95515	6.1072	8.14472	15.6238	10.7494	6.67
Lard+TMR	2	27.0828	49.498	72.4016	93.1886	156.201	1.83608	3.81759	6.06336	8.05631	15.6035	9.98938	6.688
Lard+TMR	3	26.8114	47.327	69.6879	91.4247	154.98	1.81769	3.5798	5.84368	8.10637	15.8071	10.1995	6.637
LTE+TMR	1	20.5699	38.7788	59.2402	77.5848	132.863	1.31694	2.85141	4.74388	6.70615	13.1425	9.89177	6.66
LTE+TMR	2	21.384	39.8643	60.7327	79.7558	137.748	2.27114	3.91108	5.9725	7.80854	14.603	10.6013	6.691
LTE+TMR	3	20.7056	39.1859	60.0543	79.3487	137.612	1.51933	3.13539	5.22935	7.27446	14.3288	10.4124	6.603
PalmOil+TMR	1	29.1181	50.5835	73.8942	94.0027	149.145	2.49833	4.21634	6.44278	8.52196	15.0775	10.1093	6.6
PalmOil+TMR	2	24.5048	46.3772	68.6025	89.2538	156.337	1.61871	3.553	5.60611	7.74908	15.8133	10.1149	6.632
PalmOil+TMR	3	28.0326	50.4478	74.5726	96.5808	161.493	3.03117	4.9343	7.36432	9.72513	17.5	10.8364	6.544
PTE+TMR	1	21.2483	41.2212	61.1398	79.4844	140.461	1.47264	1.48062	3.40007	5.32898	13.3435	9.49975	6.6
PTE+TMR	2	20.9769	40.4071	59.9186	74.8711	129.878	1.29356	3.01239	4.90751	6.34578	13.0253	10.0289	6.651
PTE+TMR	3	20.2985	41.2212	61.9539	80.977	138.697	2.10915	2.80911	4.90152	6.58682	13.2891	9.58137	6.53
RawATE+TMR	1	20.0271	39.0502	60.7327	79.8915	132.185	1.25246	2.61231	4.70435	6.87884	12.8752	9.7403	6.79
RawATE+TMR	2	19.6201	35.3867	49.7422	67.5441	120.923	1.26983	2.60749	4.01438	5.80107	12.4407	10.2881	6.681
RawATE+TMR	3	20.0271	39.0502	58.8331	77.7205	129.335	2.1196	3.46306	5.33248	7.23883	13.0408	10.083	6.875

## Sheet: Fermentation kinetics
SPECIES	Replicate	b	c	PD	ED	NH3-N
EragrostisOnly	1	150.26	0.010906	158.28	37.4521	11.83
EragrostisOnly	2	149.25	0.011097	159.91	37.7688	11.99
Lard+Eragr	1	148.43	0.0114	204.41	41.474	11.6
Lard+Eragr	2	162.24	0.0118	210.23	43.2947	11.72
LTE+Eragr	1	203.66	0.0085	210.66	36.656	9.4
LTE+Eragr	2	202.99	0.00901	210.49	37.0558	9.51
PalmOil+Eragr	1	206.53	0.00923	212.15	37.806	12.15
PalmOil+Eragr	2	256.13	0.01065	262.85	38.4219	11.85
PTE+Eragr	1	200.49	0.00693	199.47	40.138	8.8
PTE+Eragr	2	201.46	0.00915	202.46	40.9672	9.2
RawATE+Erag	1	150.33	0.01054	154.41	30.251	9.27
RawATE+Erag	2	202.18	0.007139	208.95	32.0251	8.79
SPECIES	Replicate	b	c	PD	ED
TMROnly	1	189.35	0.17833	146.27	104.81	22.2
TMROnly	2	189.83	0.17834	147.54	105.975	21.7
Lard+TMR	1	181.53	0.17006	142.05	100.801	21.94
Lard+TMR	2	190.81	0.18364	147.75	106.917	21.5
LTE+TMR	1	173.17	0.16227	140.56	99.768	16.8
LTE+TMR	2	174.23	0.16328	141.77	100.929	16.83
PalmOil+TMR	1	186.77	0.17517	147.07	105.597	21.9
PalmOil+TMR	2	189.17	0.17896	149.65	108.342	21.2
PTE+TMR	1	172.89	0.1627	140.6	100.077	16.7
PTE+TMR	2	173.09	0.1628	141.4	100.29	16.05
RawATE+TMR	1	193.475	0.1462	140.254	92.745	15.2
RawATE+TMR	2	195.075	0.1489	142.785	93.785	15.7
